# Supplementary material for: Hypofractionated FLASH-RT as an Effective Treatment against Glioblastoma that Reduces Neurocognitive Side Effects in Mice
Source: Oxford University Press journal article supplement (doi:10.1158/1078-0432.ccr-20-0894), 2020-10-15
Supplement: 10780432ccr200894-sup-238866_2_supp_6623590_qh77xk.docx [file 10780432ccr200894-sup-238866_2_supp_6623590_qh77xk.docx]

**Supplementary Figure Legends:**

Supplementary Figure 1:

Tumor growth delay of U87 orthotopic GBM implanted in the striatum of female Nude mice measured by contrast-enhanced Cone Beam CT (**a**) and treated with 3 x 10 Gy (BED = 60 Gy) spaced by 48h WBI delivered with FLASH or CONV radiation therapy. Tumor volumes were calculated with the formula of an ellipsoid volume: . Mean tumor volume ± SEM, *N* = 12 animals per group. *P* values were derived from the Mann–Whitney U test: **p < 0.005 compared FLASH *vs* CONV group. α/β ratio of 10 for BED calculation on the tumor. Survival curves of U87 GBM bearing mice (**b**) treated with 3 x 10 Gy WBI spaced by 48h delivered with FLASH or CONV-RT. *N*=12 animals per group. *P* values were derived from log-rank test: *p < 0.05; ****p < 0.0001 compared with the control group.
